# Supplementary material
Source: Elsevier journal article supplement (https://www.sciencedirect.com/science/article/pii/S2341192917300604)
Supplement: mmc1 [file S2341192917300604:mmc1.pdf]

## Material online complementario

### Curvas Presión/Volumen Anormales

Existen múltiples alteraciones que pueden ser representadas con la curva antes descrita. Así por ejemplo, el desplazamiento de la curva hacia la derecha, en sus puntos A y B traducen un aumento en el volumen de fin de diástole, producto de un aumento de la precarga ventricular. Si las otras condiciones no cambian, se debiese esperar que el paciente tenga un mayor volumen minuto, sin cambios en la presión arterial ni la contractilidad, a costa de mayor trabajo miocárdico representado por el área circunscrito por la curva AB'C'DE (figura 2). Por su parte, si aumenta la post carga, la curva se hará más alta y más angosta, si no cambian las condiciones de precarga y contractilidad. El costo es alcanzar una mayor presión arterial sistólica máxima y potencialmente pudiera disminuirse el gasto cardiaco, representado por la distancia A'B' (figura 3).

Para determinar el comportamiento ventricular al variar las condiciones de pre y post carga, se consideran varios ciclos cardiacos superpuestos entre si, de manera de dibujar las curvas correspondientes a la distensibilidad y la contractilidad ventricular respectivamente (figura 4). Estas relaciones representan los límites operativos del ventrículo, que estarán determinados por las condiciones intrínsecas del ventrículo. Así por ejemplo, un ventrículo poco distensible, la curva de distensibilidad tendrá mayor pendiente, es decir, para igual diferencia de volumen de fin de diástole, se generará mayor presión ventricular comparado con un corazón normal (figura 5), sometiendo a un aumento en las presiones del territorio pulmonar y a mayor riesgo de congestión pulmonar. Por su parte, para la curva de contractilidad (que es inherente para aquel ventrículo y por lo tanto es independiente de la precarga), si por ejemplo disminuye su pendiente esto traducirá una disminución de la contractilidad. De no modificarse los otros parámetros, disminuirá el gasto cardiaco, la presión arterial y el trabajo miocárdico (figura 6).

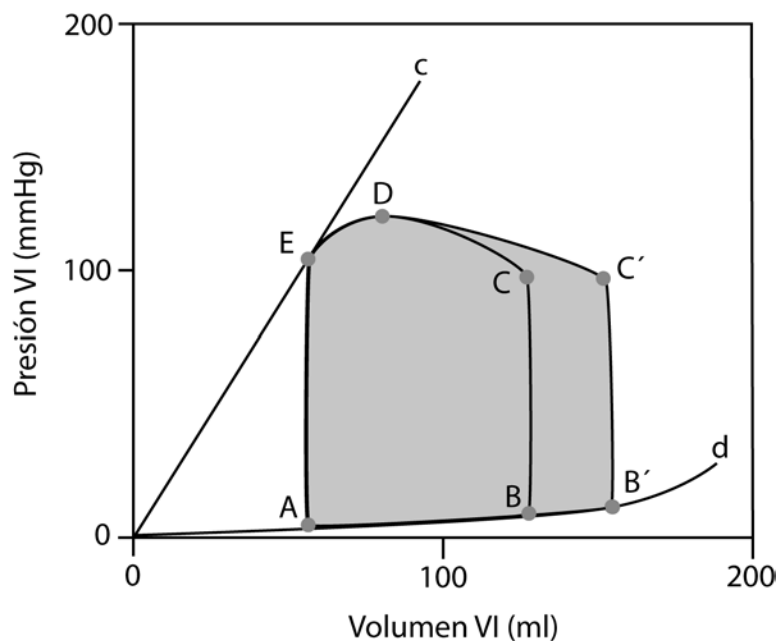

Figura 2. Gráfico presión/volumen del ventrículo izquierdo (VI), con aumento en el volumen de fin de diástole. El extremo derecho de la curva se desplaza hacia la derecha con lo que el área total bajo la curva aumenta, traduciendo un mayor trabajo ventricular.

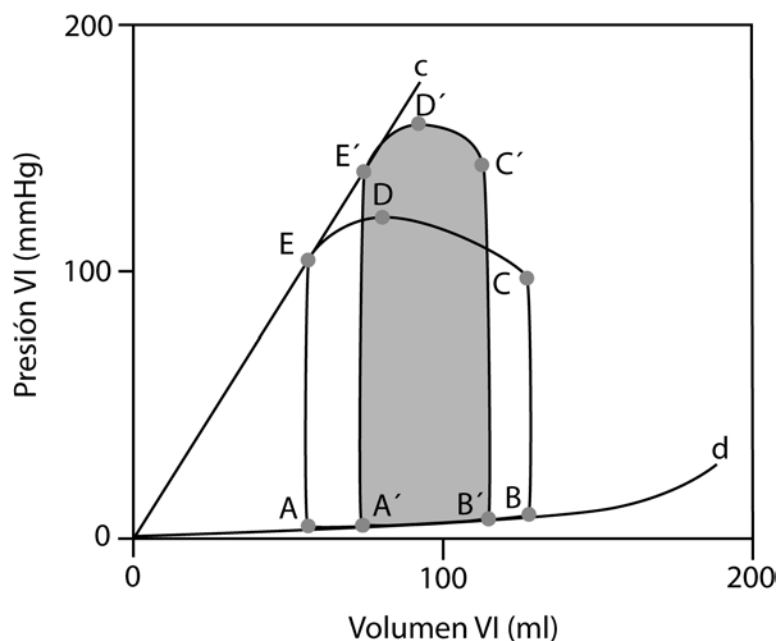

Figura 3. Gráfico presión/volumen del ventrículo izquierdo (VI), con aumento en la post carga. Al no modificarse los otros factores, se comprueba un aumento en la presión arterial sistólica máxima (D'), con un cierre más precoz de la válvula aórtica (E'), lo que implicará que el volumen de fin de sístole sea mayor.

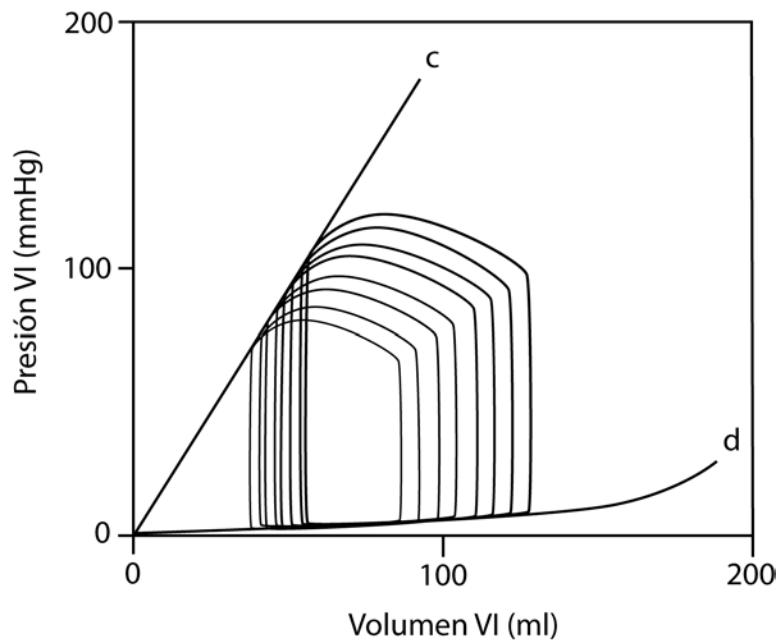

Figura 4. Gráfico presión/volumen del ventrículo izquierdo (VI), donde se superponen varios ciclos ventriculares a los que se las ha modificado las condiciones de precarga. La línea 0-d representa la línea de identidad por la que ese ventrículo se mueve. La pendiente que une los puntos de cierre de la válvula aórtica representará la contractilidad miocárdica (línea 0-c), que es precarga-independiente.

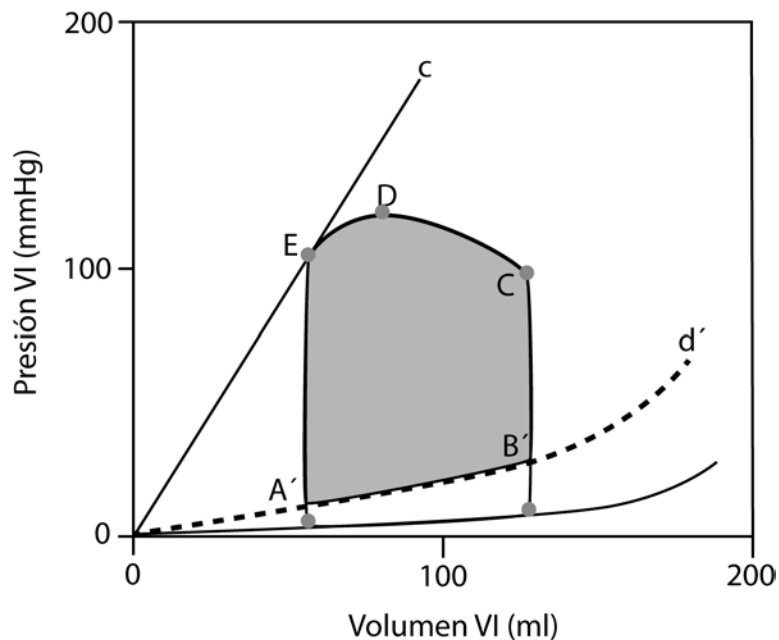

Figura 5. Gráfico presión/volumen del ventrículo izquierdo (VI) en que la distensibilidad del VI ha disminuido (línea 0-d'). La nueva curva, en gris, se observa superpuesta a la curva normal.

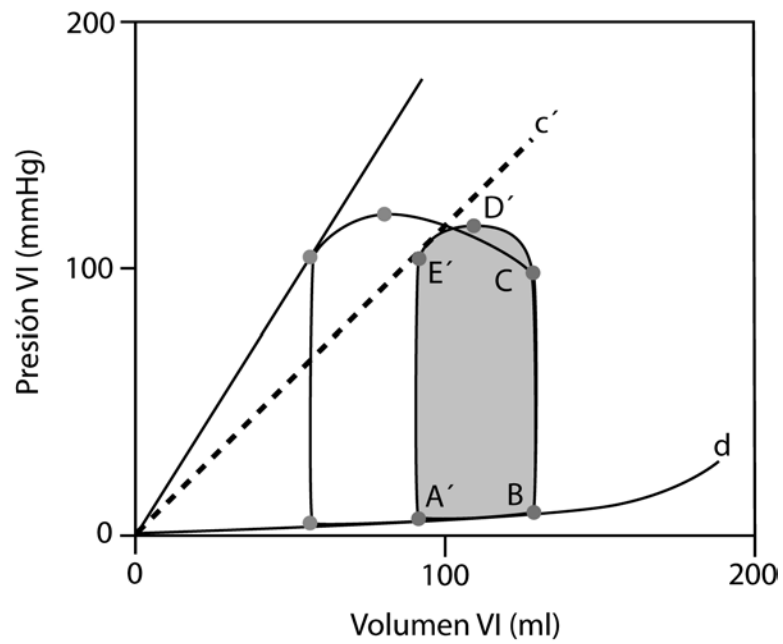

Figura 6. Gráfico presión/volumen del ventrículo izquierdo (VI) en que la contractilidad del VI ha disminuido (línea 0-c'). La nueva curva, en gris, se observa superpuesta a la curva normal.
